# Supplementary material for: Thieno[3,2-b]thiophene oligomers and their applications as p-type organic semiconductors
Source: Royal Society of Chemistry journal article supplement (doi:10.1039/b900979e), 2009-01-01
Supplement: b900979e.pdf [file b900979e.pdf]

## Supporting information

### Thieno[3,2-b]thiophene Oligomers as p-Type Organic Semiconductors and their Supramolecular Bulk Self-Organization

Moawia O. Ahmed,<sup>†</sup> Chunmei Wang,<sup>†</sup> P. Keg,<sup>†</sup> Wojciech Pisula,<sup>§</sup> Y. M. Lam,<sup>†</sup> Beng S. Ong,<sup>‡</sup> S. C. Ng,<sup>||</sup> Z.-K. Chen<sup>\*‡</sup> and S. G. Mhaisalkar<sup>\*†</sup>

<sup>†</sup>*School of Materials Science and Engineering, Nanyang Technological University, 50 Nanyang Avenue, 639798 Singapore*

<sup>‡</sup>*Institute of Materials Research and Engineering (IMRE), 3 Research Link, Singapore 117602*

<sup>§</sup>*Max Planck Institute for Polymer Research, Ackermannweg 10, 55128 Mainz, Germany.*

<sup>||</sup>*Division of Chemical and Biomolecular Engineering, Nanyang Technological University, Singapore 637459*

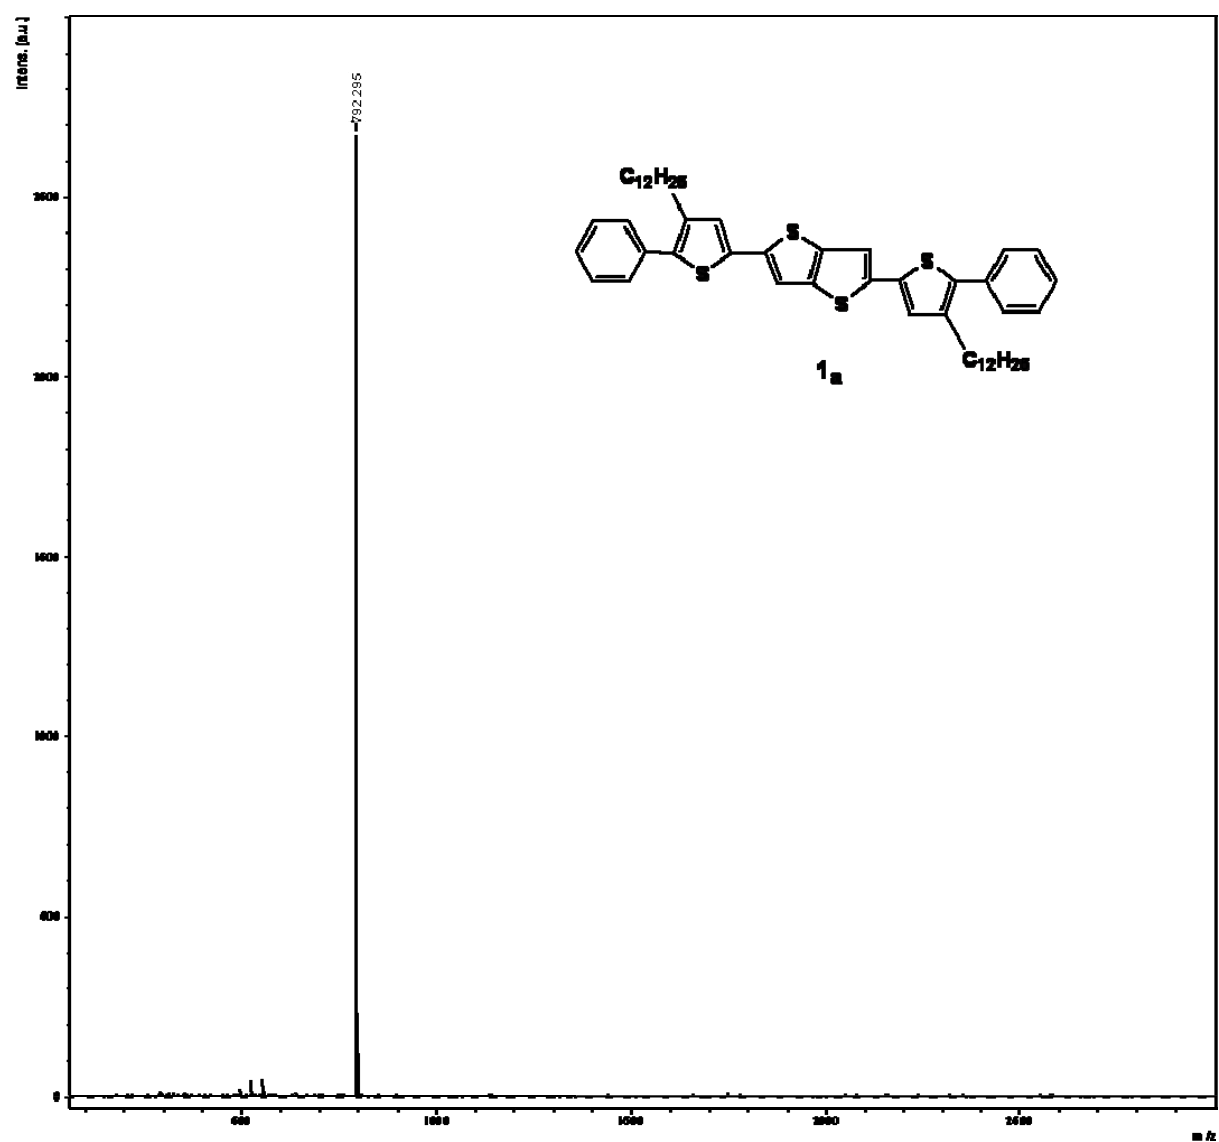

**Figure S1.** MALDI-TOF-MS (dithranol) of **1a**,  $M = 972.295$

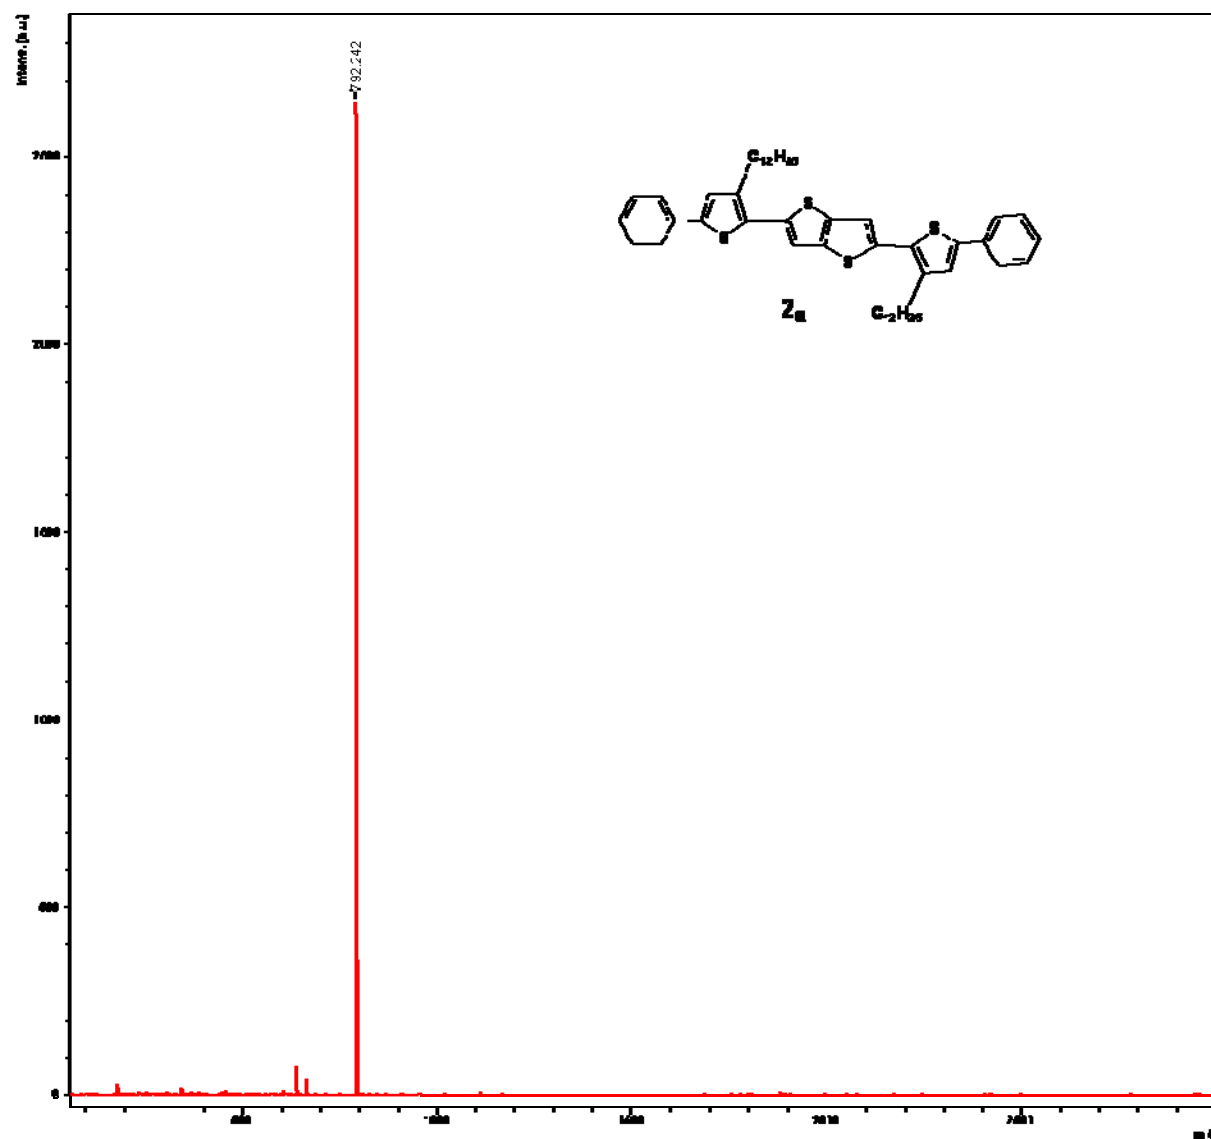

Figure S2. MALDI-TOF-MS (dithranol) of **2a**  $M = 972.242$

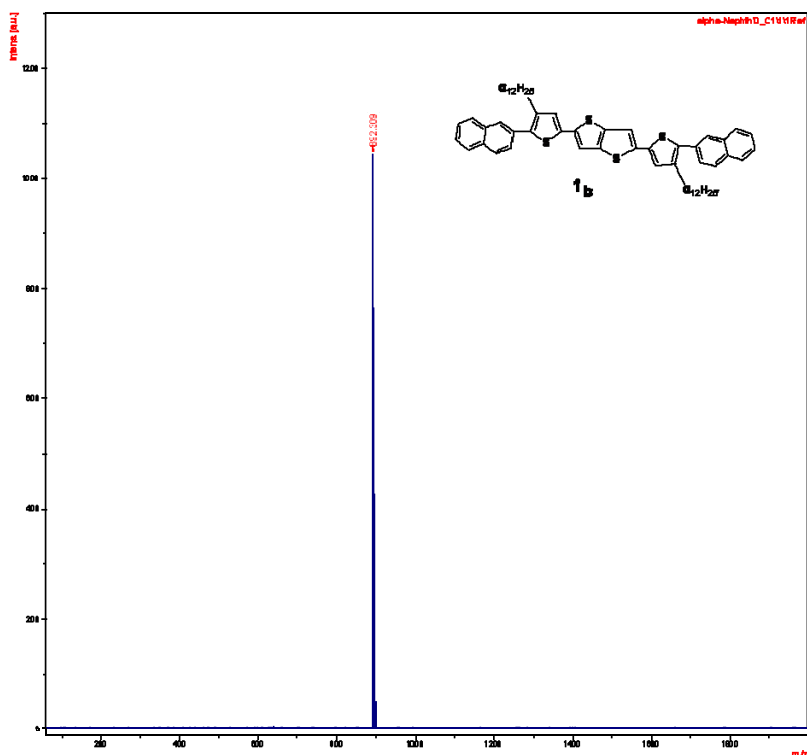

**Figure S3.** MALDI-TOF-MS (dithranol) of **1b**,  $M = 892.309$

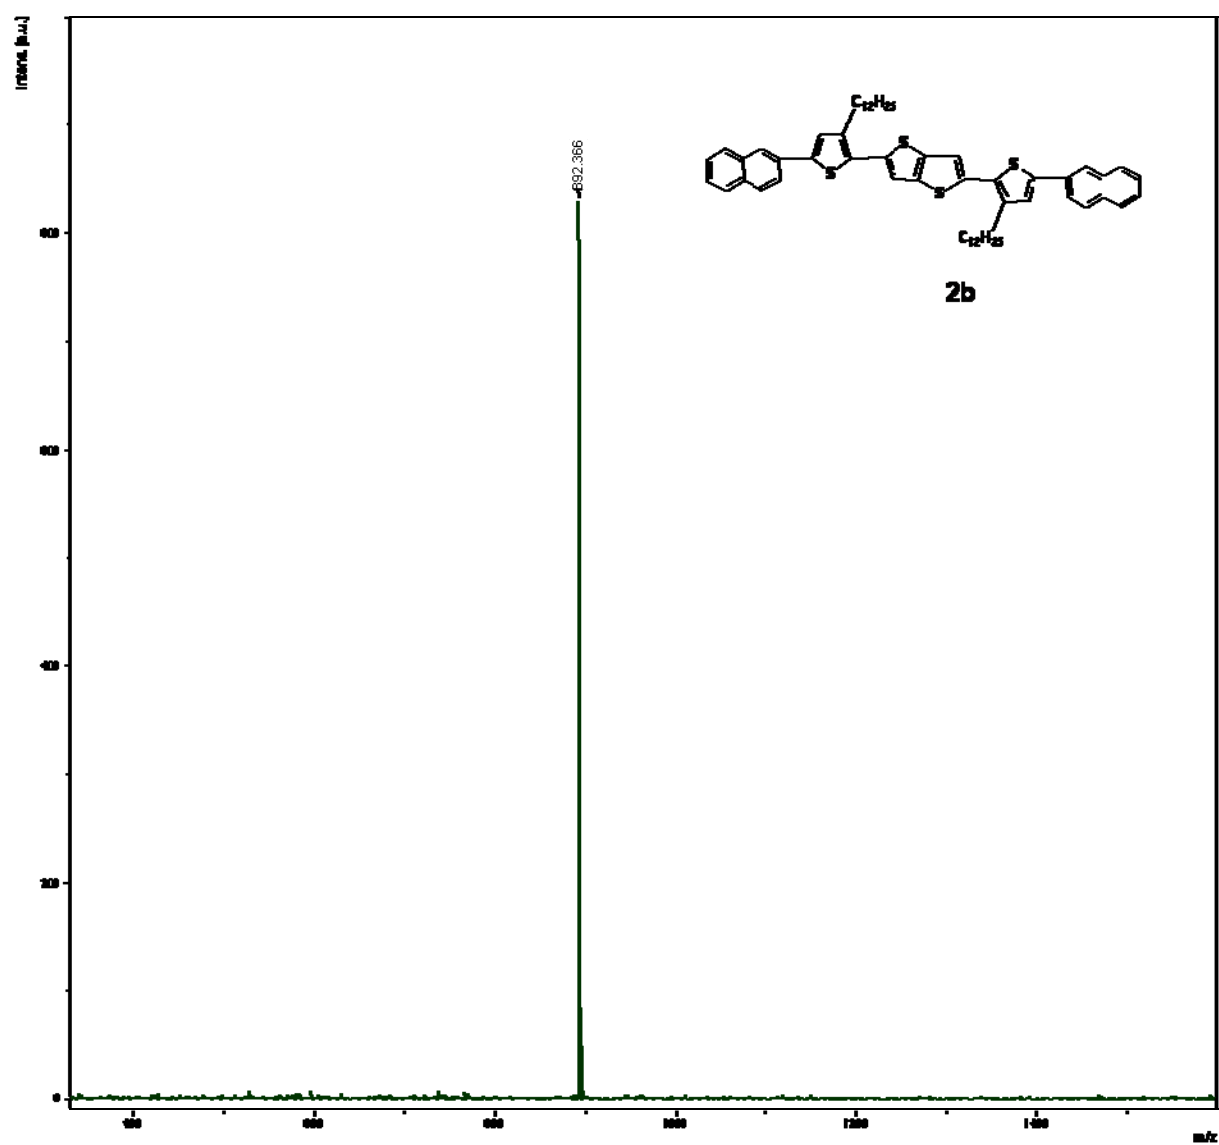

Figure S4. MALDI-TOF-MS (dithranol) of **2b**  $M = 892.366$

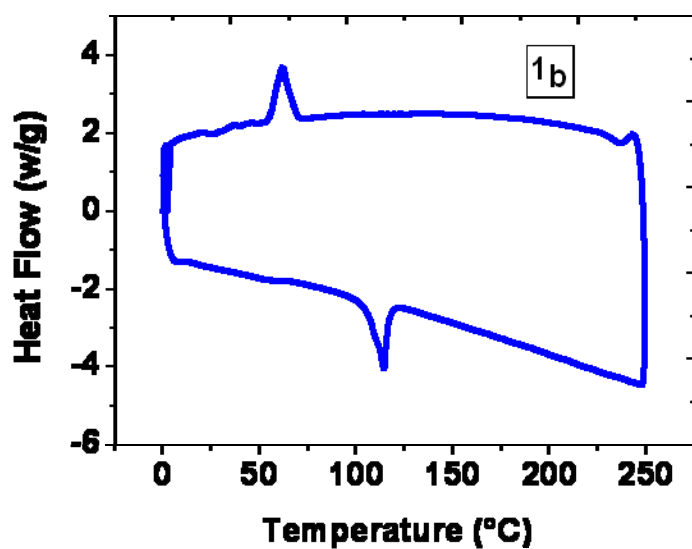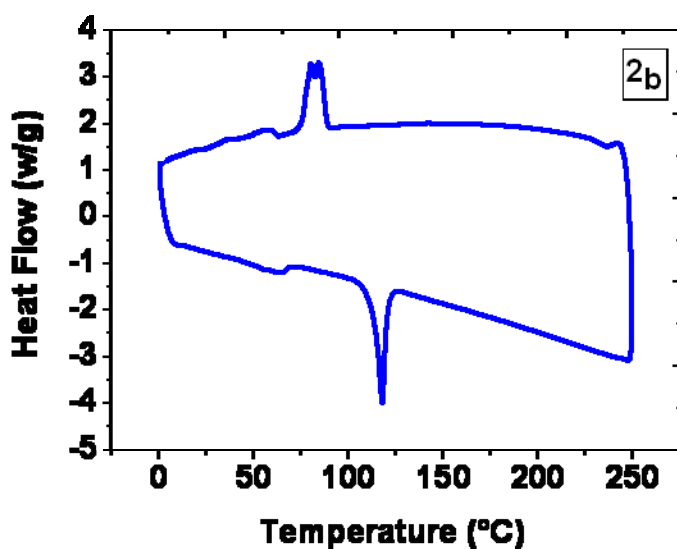

Figure S5. DSC scans for **1b** and **2b** at a rate of 10 °C/min. The heating/cooling

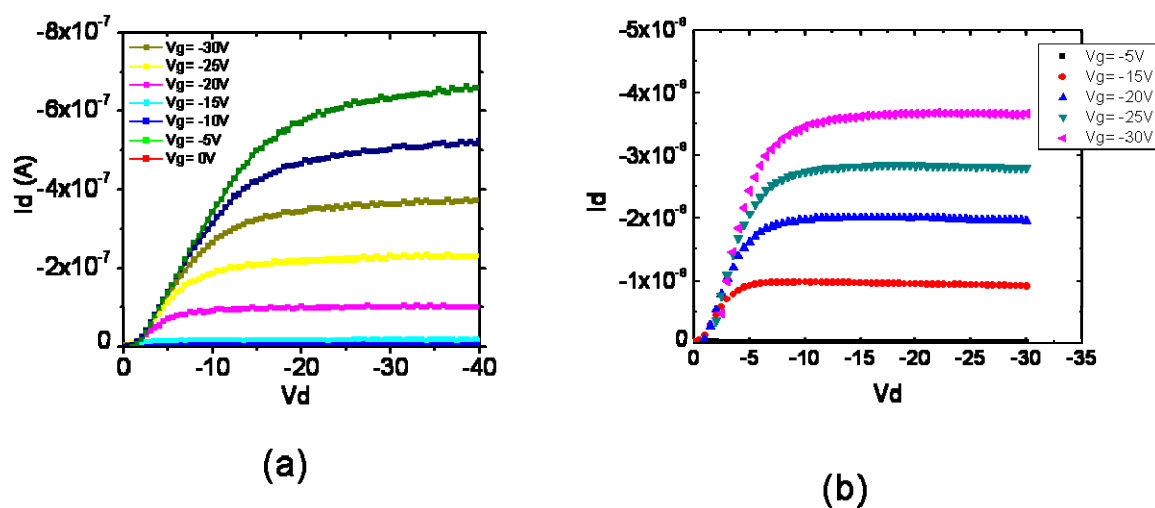

**Figure S6.** Output and transfer characteristics of **1a** for a bottom-contact device (a) with  $W = 30 \mu\text{m}$  and  $L = 11120 \mu\text{m}$  and a top-contact device (b) with  $W = 150 \mu\text{m}$  and  $L = 500 \mu\text{m}$
